# Supplementary material for: Measuring the healthfulness of food retail stores: variations by store type and neighbourhood deprivation
Source: Springer Nature journal article supplement (doi:10.1186/1479-5868-11-69), 2014-05-23

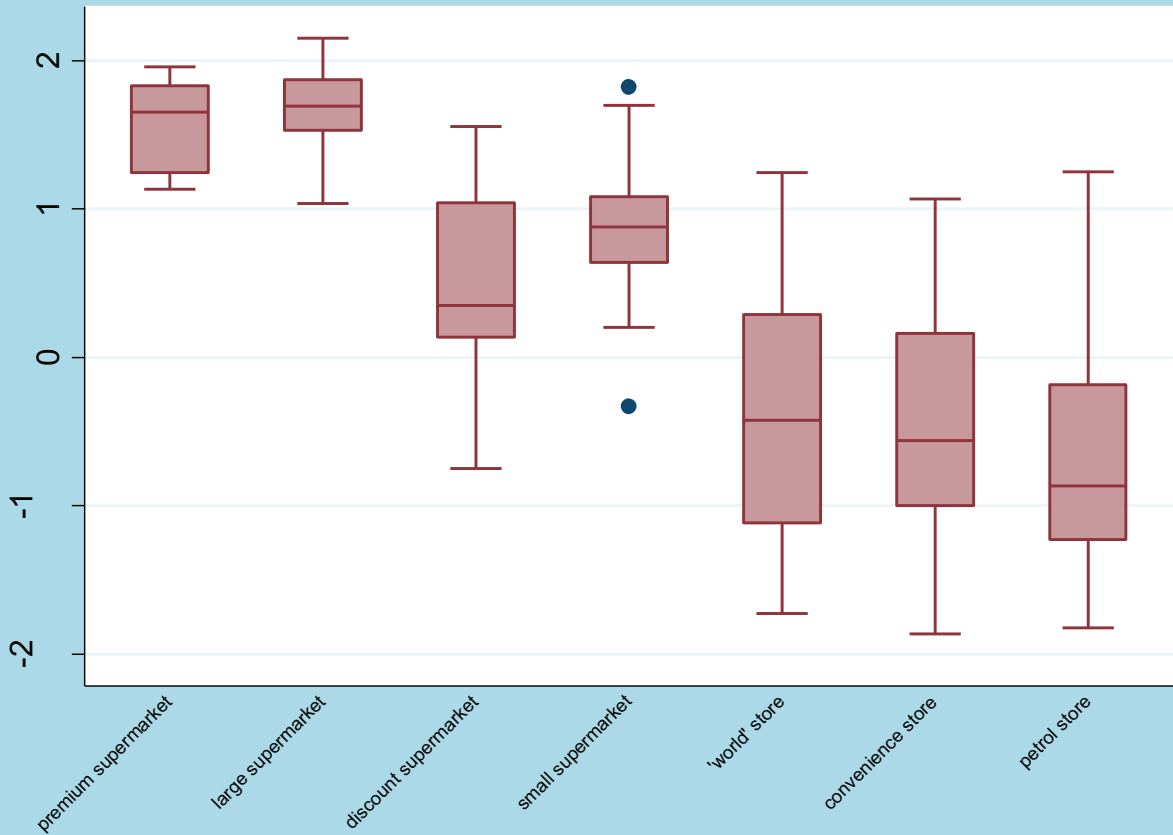

Supplement: 12966_2013_963_MOESM3_ESM.pdf [file 12966_2013_963_MOESM3_ESM.pdf]
